# Supplementary material for: Atomic Scale Optimization Strategy of Al-Based Layered Double Hydroxide for Alkali Stability and Supercapacitors
Source: MDPI journal article supplement (doi:10.3390/ijms231911645), 2022-10-01
Supplement: s1 [file s1]

# Supplementary Information

Figure S1. XRD patterns of NiAl LDH at different concentrations of KOH.

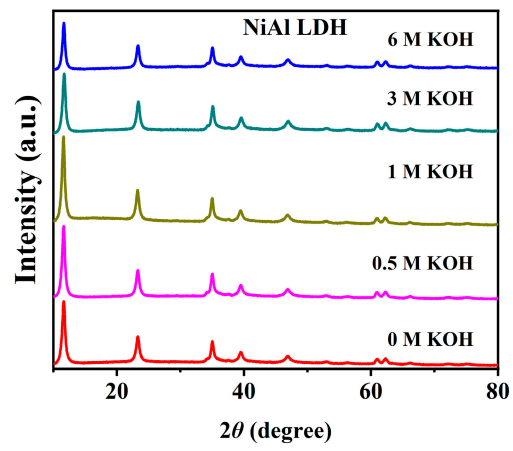

Figure S2. (a) XRD patterns of CoAl LDH at different concentrations of KOH, (b) partial enlarged drawing of (a).

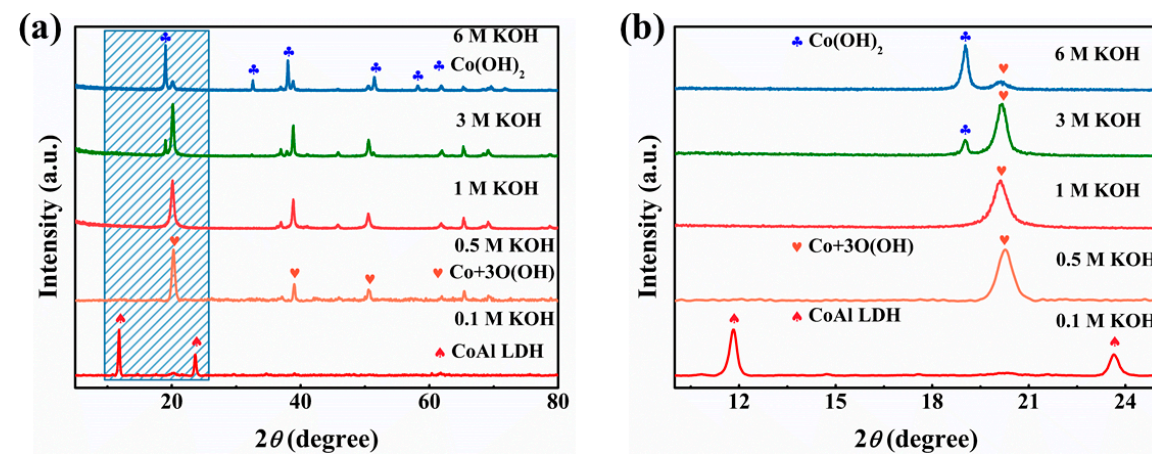

Figure S3. (a) CV, GCD curves and rate capacities of NiAl LDH, CoAl LDH and CoAl LDH-E.

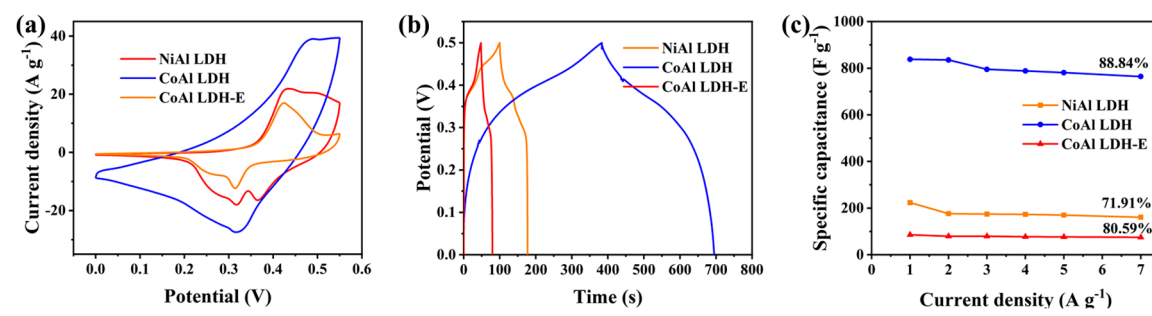

Figure S4. (a) The morphology, (b) selected area electron diffraction, (c) elements content and (d) EDS mapping of  $\text{Ni}_2\text{Co}_1\text{Al}$  LDH

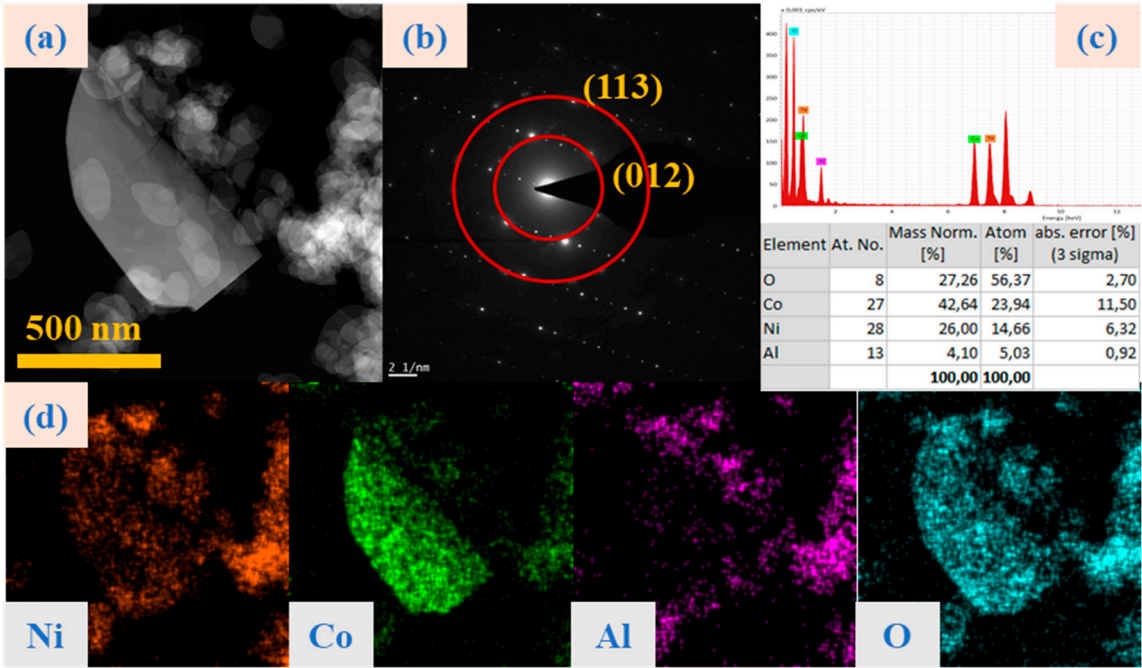

Figure S5. (a) The morphology, (b) selected area electron diffraction, (c) elements content and (d) EDS mapping of  $\text{Ni}_2\text{Co}_1\text{Al}$  LDH-E.

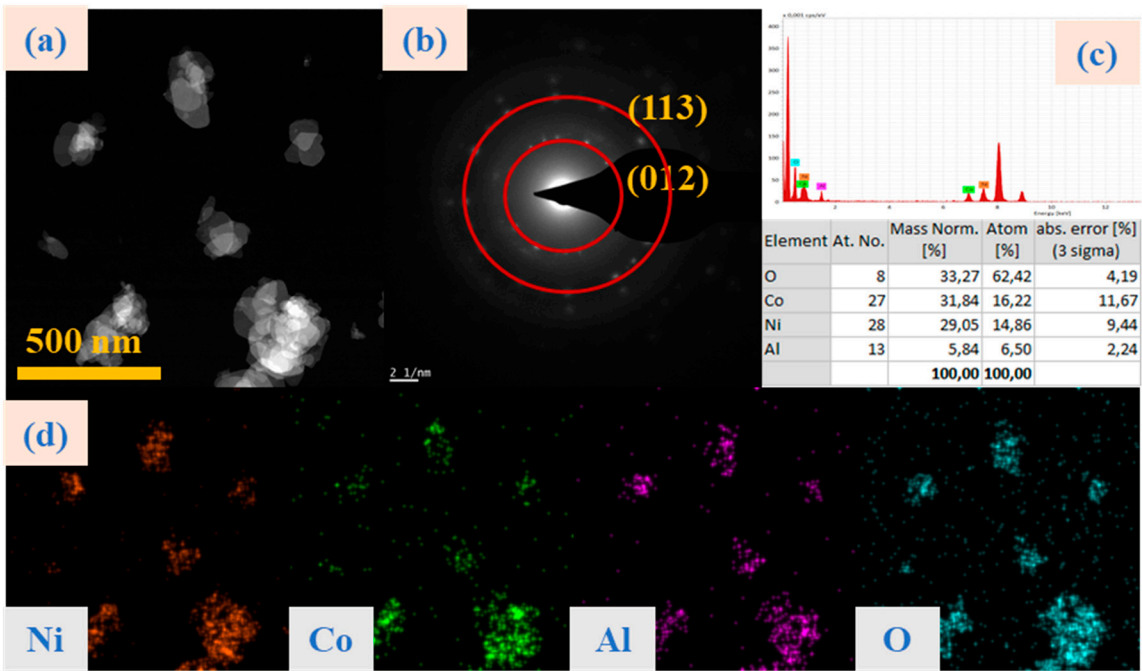

Figure S6. The CV, GCD curves and Nyquist plots of Ni<sub>2</sub>Co<sub>1</sub>Al LDH-E, Ni<sub>1</sub>Co<sub>2</sub>Al LDH-E, Ni<sub>2</sub>Co<sub>1</sub>S<sub>4</sub>-E and Ni<sub>1</sub>Co<sub>2</sub>S<sub>4</sub>-E.

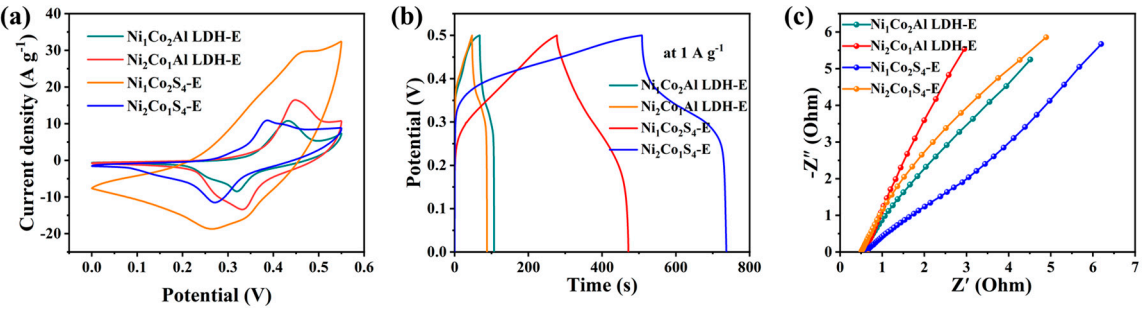

Figure S7. The GCD curves of AC at the current densities of 1, 2 and 3 A g<sup>-1</sup>.

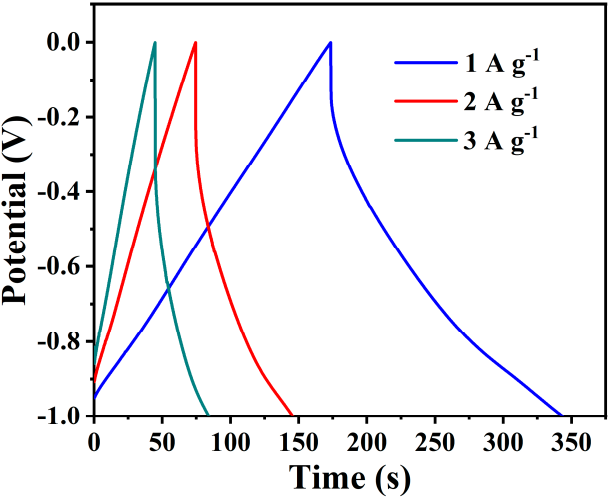

Table S1. The specific surface area, pore volume and average pore diameter of Ni<sub>2</sub>Co<sub>1</sub>S<sub>4</sub>, Ni<sub>2</sub>Co<sub>1</sub>S<sub>4</sub>-E, Ni<sub>2</sub>Co<sub>1</sub>Al LDH and Ni<sub>2</sub>Co<sub>1</sub>Al LDH-E.

|                                    | Ni <sub>2</sub> Co <sub>1</sub> S <sub>4</sub> | Ni <sub>2</sub> Co <sub>1</sub> S <sub>4</sub> -E | Ni <sub>2</sub> Co <sub>1</sub> Al LDH | Ni <sub>2</sub> Co <sub>1</sub> Al LDH-E |
|------------------------------------|------------------------------------------------|---------------------------------------------------|----------------------------------------|------------------------------------------|
| Specific surface                   |                                                |                                                   |                                        |                                          |
| area                               | 7.1648                                         | 31.0860                                           | 58.8592                                | 63.2865                                  |
| (m <sup>2</sup> g <sup>-1</sup> )  |                                                |                                                   |                                        |                                          |
| Pore volume                        | 0.040893                                       | 0.151196                                          | 0.376361                               | 0.372464                                 |
| (cm <sup>3</sup> g <sup>-1</sup> ) |                                                |                                                   |                                        |                                          |
| Average pore                       |                                                |                                                   |                                        |                                          |
| diameter                           | 18.4100                                        | 14.9734                                           | 13.6747                                | 13.0023                                  |
| (nm)                               |                                                |                                                   |                                        |                                          |
